# Supplementary material for: Treatment Response in Advanced and Metastatic Esophageal Cancer Patients on Palliative Treatments in Tikur Anbesa Specialized Hospital, Addis Ababa, Ethiopia: A Retrospective Study
Source: Research Square preprint supplement (doi:10.21203/rs.3.rs-9080266/v1), 2026-05-20
Supplement: Supplementary file 1 [file 4a727ef573f96503ea8b9e53.docx]

| 1, | Case /patient/ID |  |
| --- | --- | --- |
| 2, | Patient age in years |  |
| 3, | Sex | 1,female  2,male |
| 4, | Religion | 1.orthodox  2.muslim  3.protestant  4.catholic  5.other |
| 5, | Region | 1.addis ababa  2.oromia  3.amhara  4.afar  5.tigray  6.sumale  7.snnpr  8.gambela  9.benishangul gumuz  10.harari  11,diredawa |
| 6, | Marital status | 1.married  2.divorced  3.widowed  4.single |
| 7, | Common habits | 1.no habits  2.drinks alcohol  3.smoke cigarettes  4.drink alcohol and smoke cigarettes |
| 8, | Comorbidity | 1.no comorbidity  2.RVI  3.cardiovascular disease  4.metabolic  5.other |
| 9, | Occupation | 1.housewife  2.farmer  3.goverment employee  4.merchant  5.other |
| 10, | Initial presenting symptoms | 1.dysphagia  2.odnophagia  3.regurgitation  4.vomiting  5.chest pain  6.cough  7.fatigue  8.weightloss  9.other |
| 11, | performance status at presentation/ECOG/ |  |
| 12, | Pertinent physical finding at presentation | 1.cervical/supraclavicular  2.chest finding  3.abdominal finding  4.non speific finding |
| 13, | Endoscopic location of esophageal mass | 1.cervical esophagus  2.upper thoracic esophagus  3.mid thoracicesophagus  4.distal/GEJ |
| 14, | Histologic type of the esophageal cancer | 1.Scc  2.adeenocarcinoma  3.other |
| 15, | Date of histologic diagnosis |  |
| 16, | TNM staging/AJCC / |  |
| 17, | Initial treatment plan | 1.surgery  2.stenting  3.Radiotherapy/RT/  4.chemotherapy  5.combination  6.other |
| 18, | Did the patient underwent surgery | 1.surgery  2.no |
| 19, | If patient underwent surgery,type of surgery is.. | 1.feeding gastrostomy/jejunostomy tube  2.by pass surgery  3.palliative resection and anastomsis |
| 20, | Interval between diagnosis and surgery in months |  |
| 20.1 | Grade of dysphagia just before surgery |  |
| 20.2 | Performance before surgery |  |
| 20.3 | Stage before surgery |  |
| 20.4 | Grade of dysphagia 1 month after surgery |  |
| 20.5 | Performance 1 month after surgery |  |
| 20.6 | Assesment 1 month after surgery | 1.CR  2.PR  3.SD  4.PD  5.clinical benefit  6.dead |
| 20.7 | Dysphagia 3 months after surgery |  |
| 20.8 | Performance 3 month after surgery |  |
| 20.9 | Assessment 3 months after surgery | 1.CR  2.PR  3.SD  4.PD  5.Clinical benefit  6.dead |
| 21, | Did patient underwent stenting | 1.yes  2.no |
| 22, | Did patient took RT | 1.yes  2.no |
| 23, | Did patient took chemotherapy | 1.yes  2.no |
| 24, | Interval between diagnosis and chemotherapy in months |  |
| 25, | Type of chemotherapy | 1.cisplatin/paclitaxel  2.carboplatin/paclitaxel  3.cisplatin/5 fu  4.carboplatin/5 fu  5.folfox  6.caapox  7.other |
| 26.1 | Grade of dysphagia at first chemo |  |
| 26.2 | Performance at first chemo |  |
| 26.3 | TNM at first chemo |  |
| 26.4 | Grade of dysphagia at midcycle |  |
| 26.5 | Performance at midcycle |  |
| 26.6 | Assessment at midcycle | 1.CR  2.PR  3.SD  4.PD  5.clinical benefit  6.dead |
| 26.7 | Did the patient complete the chemotherapy | 1.yes  2.no |
| 26.8 | Grade of dysphagia at end cycle |  |
| 26.9 | Performance at end cycle |  |
| 27 | Assessment at end of chemotherapy | 1.CR  2.PR  3.SD  4.PD  5.Clinical benefit  6.dead |
| 27.1 | Dysphagia after 3 month of chemotherapy |  |
| 27.2 | Performance 3 months after chemotherapy |  |
| 27.3 | Assesment 3 months after chemotherapy | 1.CR  2.PR  3.SD  4.PD  5.Clinical benefit  6.dead |
| 28, | Did patient started on other lines of treatment except chemotherapy | 1.yes  2.no |
| 29, | What treatment do patient started on after progression | 1.surgery  2.RT  3.stenting  4.supportive care |
| 30, | Dysphagia at start of 2nd line treatment |  |
| 30.1 | Performance at start of 2nd line treatment |  |
| 30.2 | Assessment at the start of 2nd line treatment | 1.CR  2.PR  3.SD  4.PD  5.Clinical benefit  6.dead |
| 30.3 | Dysphagia 1 month after initiation of 2 ndline treatment |  |
| 30.4 | Performance 1 month after initiation of other treatment/2nd line/ |  |
| 30.5 | Assessment after 1 month of treatment with 2nd line | 1.CR  2.PR  3.SD  4.PD  5.clinical benefit  6.dead |
| 30.6 | Dysphagia 3 month after 2 nd line of treatment |  |
| 30.7 | Performance 3 month after 2nd line of treatment |  |
| 30.8 | Assessment 3 month after 2nd line of treatment | 1.CR  2.PR  3.SD  4.PD  5.clinical benefit  6.dead |
| 31 | Did patient took 2nd line chemotherapy after progression | 1.yes  2.no |
| 31.1 | If patient took chemotherapy |  |
| 31.1 | Dysphagia at 2nd line of chemotherapy |  |
| 31.2 | Performance at 2nd line of chemotherapy |  |
| 31.3 | Assessment at 2 nd line of chemotherapy | 1.CR  2.PR  3.SD  4.PD  5.clinical benefit  6.dead |
| 31.4 | Dysphagia at midcycle of 2nd line of chemotherapy |  |
| 31.5 | Performance at midcycle of 2nd line of chemotherapy |  |
| 31.6 | Assessment at midcycle of 2nd line of chemotherapy | 1.CR  2.PR  3.SD  4.PD  5.Clinical benefit  6.dead |
| 31.7 | Dysphagia at end cycle of 2nd line chemotherapy |  |
| 31.8 | Performance at end cycle of 2nd line of chemotherapy |  |
| 31.9 | Assessment at end cycle of 2ndline of chemotherapy | 1.CR  2.PR  3.SD  4.PD  5.clinical benefit  6.dead |
| 32.1 | Dysphagia 3 months after 2nd line of chemotherapy |  |
| 32.2 | Performance 3 months after 2ndline of chemotherapy |  |
| 32.3 | Assessment 3 months after 2nd line of chemotherapy | 1.CR  2.PR  3.SD  4.PD  5.clinical benefit  6.dead |
| 33 | How long did the patient survive without progression after improvement in months |  |
| 34 | Patient survival in total months after diagnosis |  |
|  |  |  |
|  |  |  |
|  |  |  |
|  |  |  |
|  |  |  |
|  |  |  |
